# Supplementary material for: An atomistic view of Hsp70 allosteric crosstalk: from the nucleotide to the substrate binding domain and back
Source: PubMed Central journal article supplement (PMC4812256; doi:10.1038/srep23474), 2016-03-30
Supplement: srep23474-s1.pdf [file srep23474-s1.pdf]

# **An atomistic view of Hsp70 allosteric crosstalk: from the nucleotide to the substrate binding domain and back**

*Federica Chiappori<sup>1</sup>, Ivan Merelli<sup>1</sup>, Luciano Milanesi<sup>1\*</sup>, Giorgio Colombo<sup>2</sup>, Giulia Morra<sup>2\*</sup>*

<sup>1</sup> Istituto di Tecnologie Biomediche – CNR, Segrate (Mi), 20090 Italy

<sup>2</sup> Istituto di Chimica del Riconoscimento Molecolare – CNR, Milano, 20131 Italy

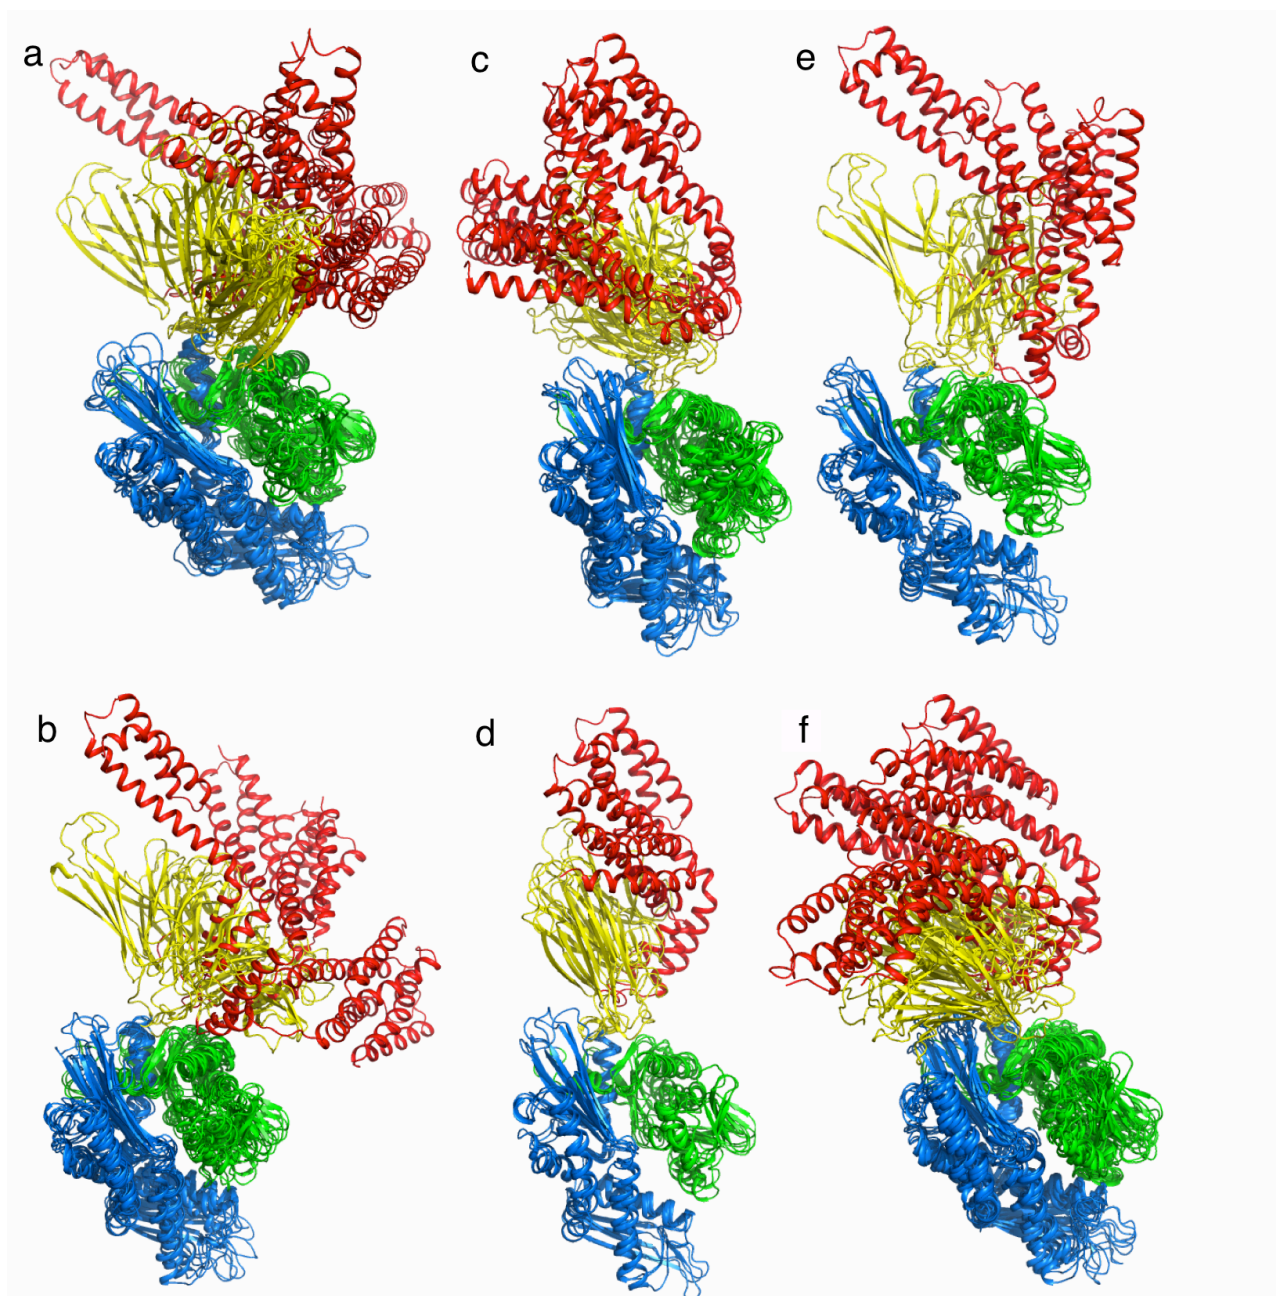

**Figure S1 Representative conformations of all clusters.** Cluster analysis was applied on concatenated trajectories for each complex. Conformations are superposed based on the NBD. a) NBD(ADP)-SBD(apo); b) NBD(ATP)-SBD(apo); c) NBD(ADP)-SBD(NR); d) NBD(ATP)-SBD(NR); e) NBD(ADP)-SBD(Api88); f) NBD(ATP)-SBD(Api88).

**Table S1 Contact surface residues**

| NBD(ADP)-SBD(free)        | NBD(ADP)-SBD(Api88)    | NBD(ADP)-SBD(NR)       | NBD(ATP)-SBD(free)    | NBD(ATP)-SBD(Api88) | NBD(ATP)-SBD(NR)      |
|---------------------------|------------------------|------------------------|-----------------------|---------------------|-----------------------|
| 135-138, 145-158, 163-167 | 134-138, 163-166       | 136, 154, 158, 163-167 | 113, 135-137, 150-166 | 150, 154, 166, 167  | 147-154, 158, 164-169 |
|                           |                        |                        |                       | 212-215             | 213-216               |
| 377-383                   | 377-383                | 382, 383               | 383                   | 382, 383            | 380-383               |
| 388-396                   | 388-397                | 388-394                | 388-391               | 388-390             | 388-395               |
| 414-421, 479-481          | 415, 418, 481          | 413-422, 480           | 442, 452-454, 483     | 480-483             | 480, 481              |
| 509                       | 502, 504-510, 513, 517 |                        | 500-514               | 502                 | 502-509               |

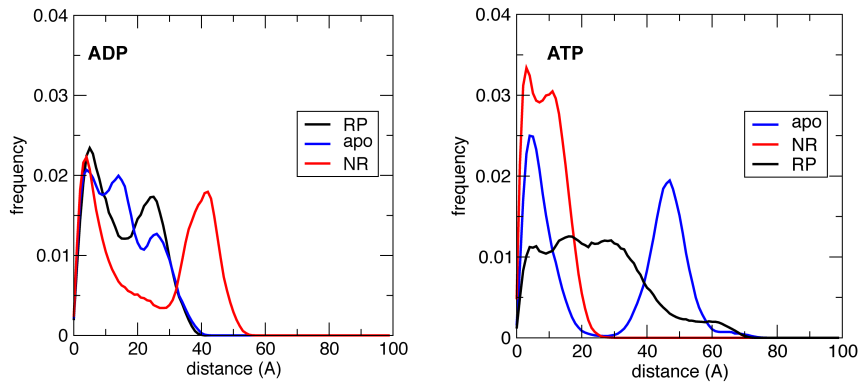

**Figure S2 Pair distance distribution of SBD center of mass positions.** Left, histogram showing the peaks in pair distances between different positions of the SBD center of mass in the presence of ADP and different SBD ligand states. Right, same with ATP in the NBD binding site.

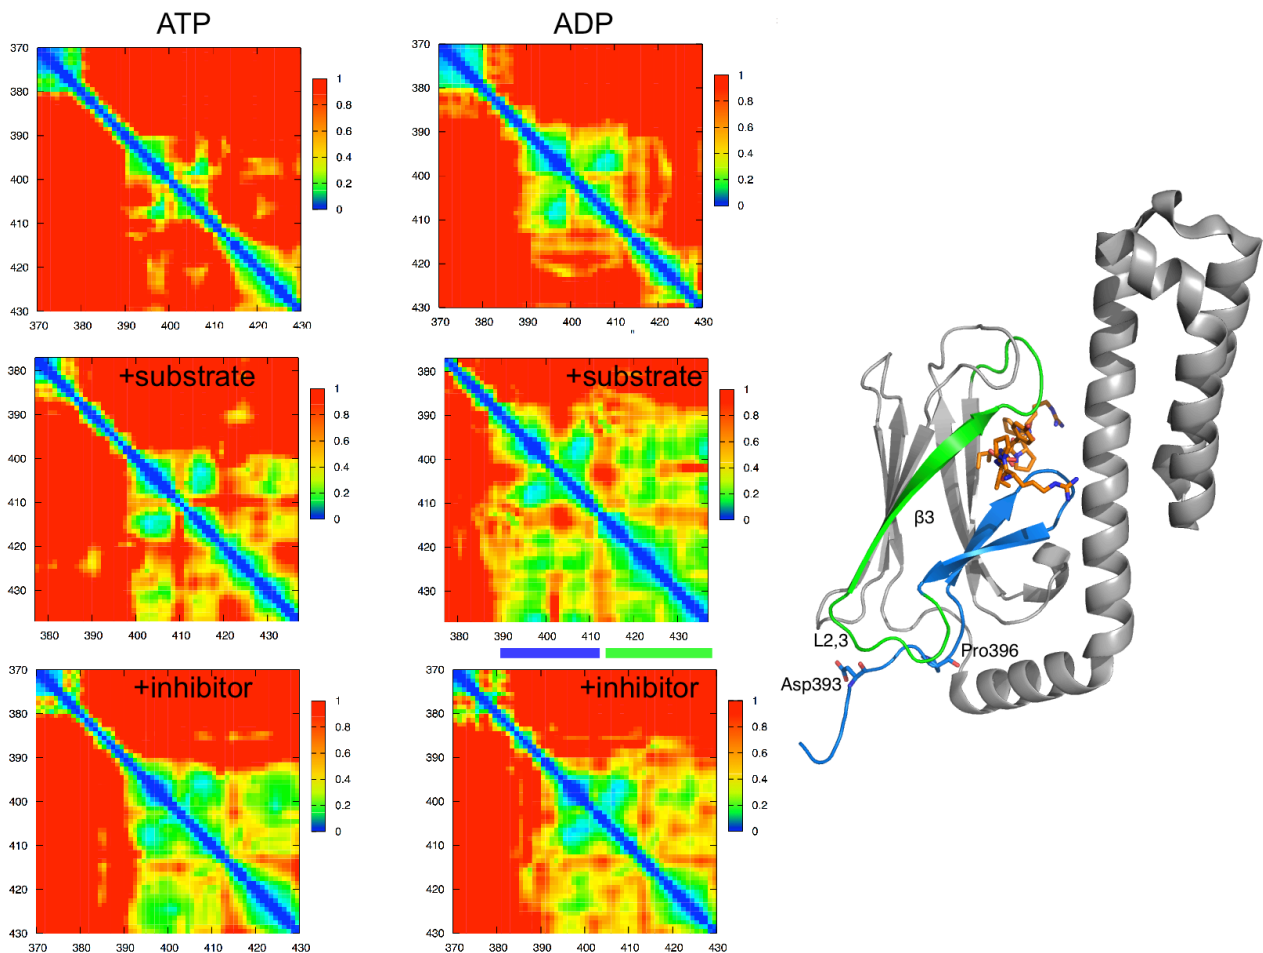

**Figure S3  $\beta$ SBD rigidity**

Left panel. Distance fluctuation maps reporting on the pair distance fluctuations for residues 370-430 in the presence of ATP (left) and ADP (right) and in different ligand states: from top to bottom, SBD(free), SBD(NR), SBD(Api88). Right, structural representation of the SBD highlighting loop L<sub>2,3</sub> comprising residues 412-420.

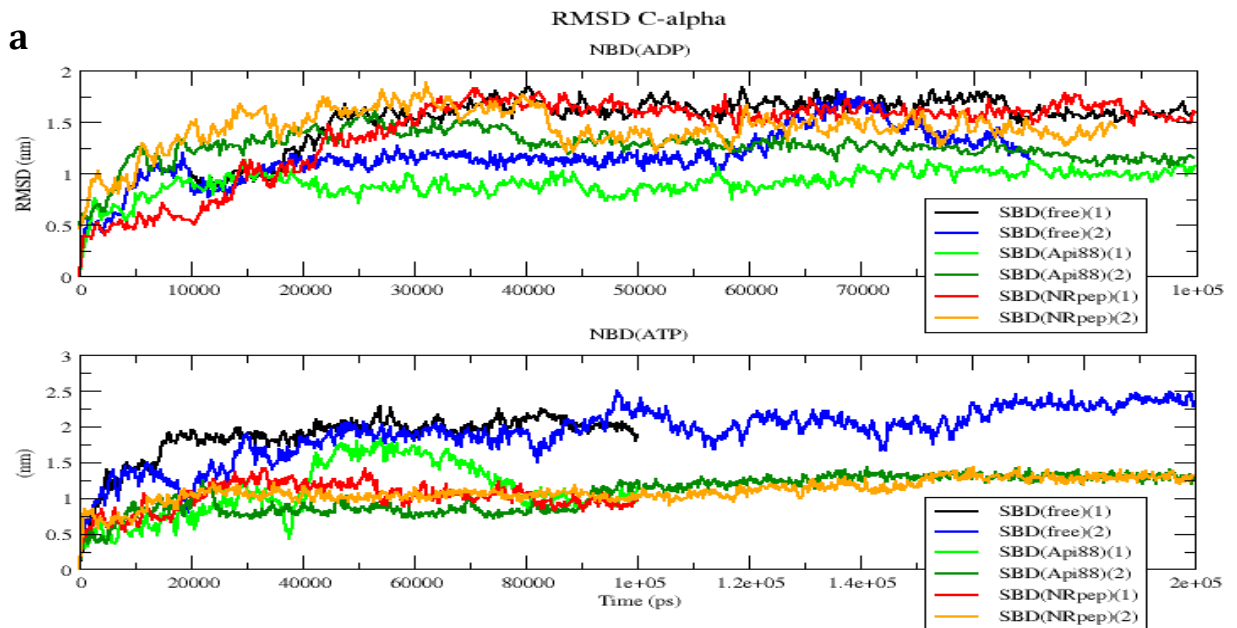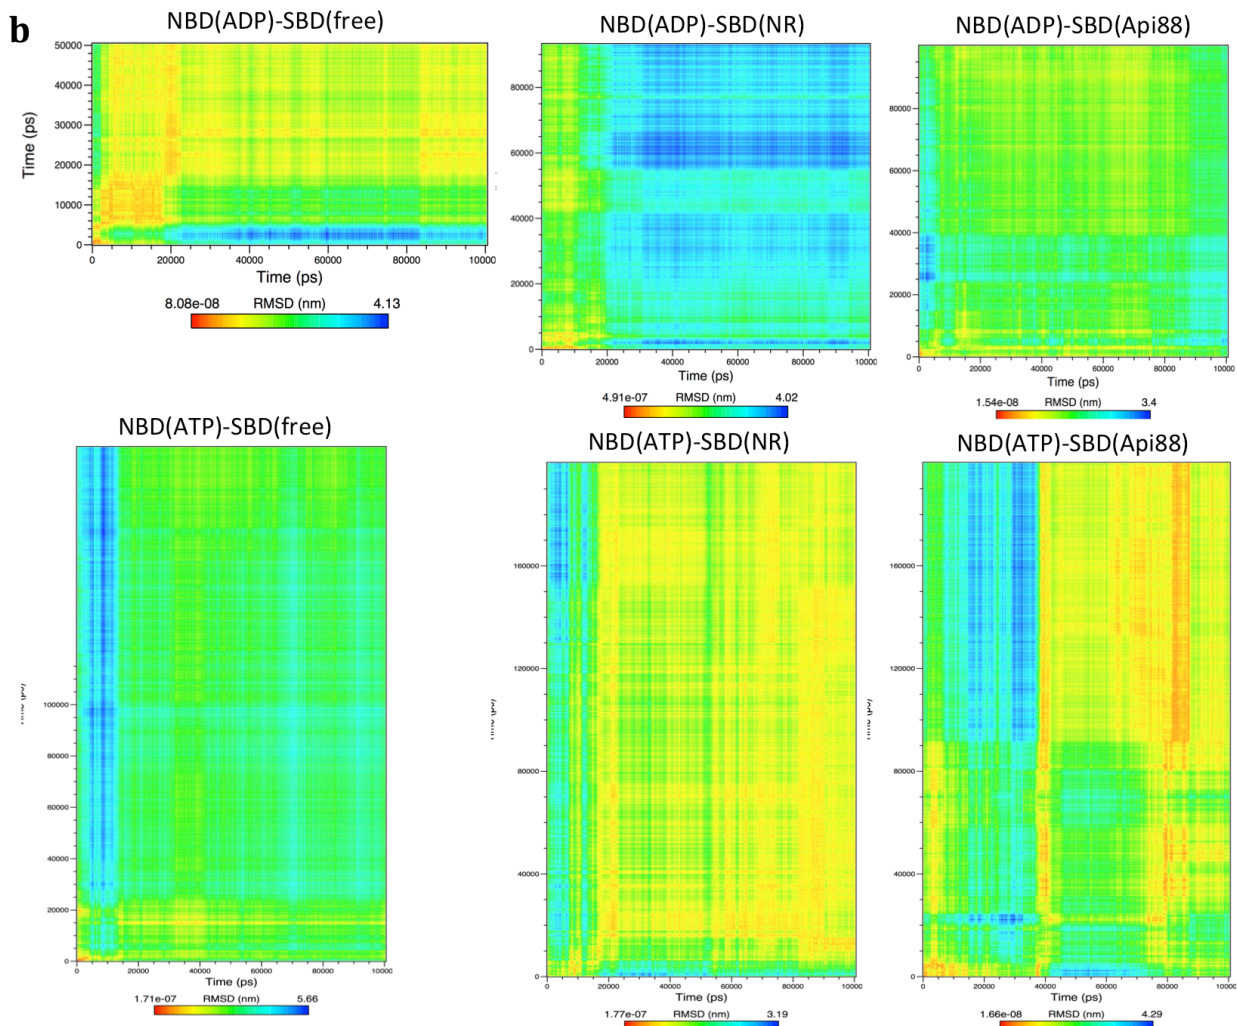

**Figure S4 Simulation convergence. a)** time dependent C $\alpha$  RMSD. **b)** RMSD matrix of the C $\alpha$  atoms of the two independent trajectories of each complex, obtained aligning the NBD, so that the RMSD mostly reports on the convergence and similarity of the interdomain arrangements

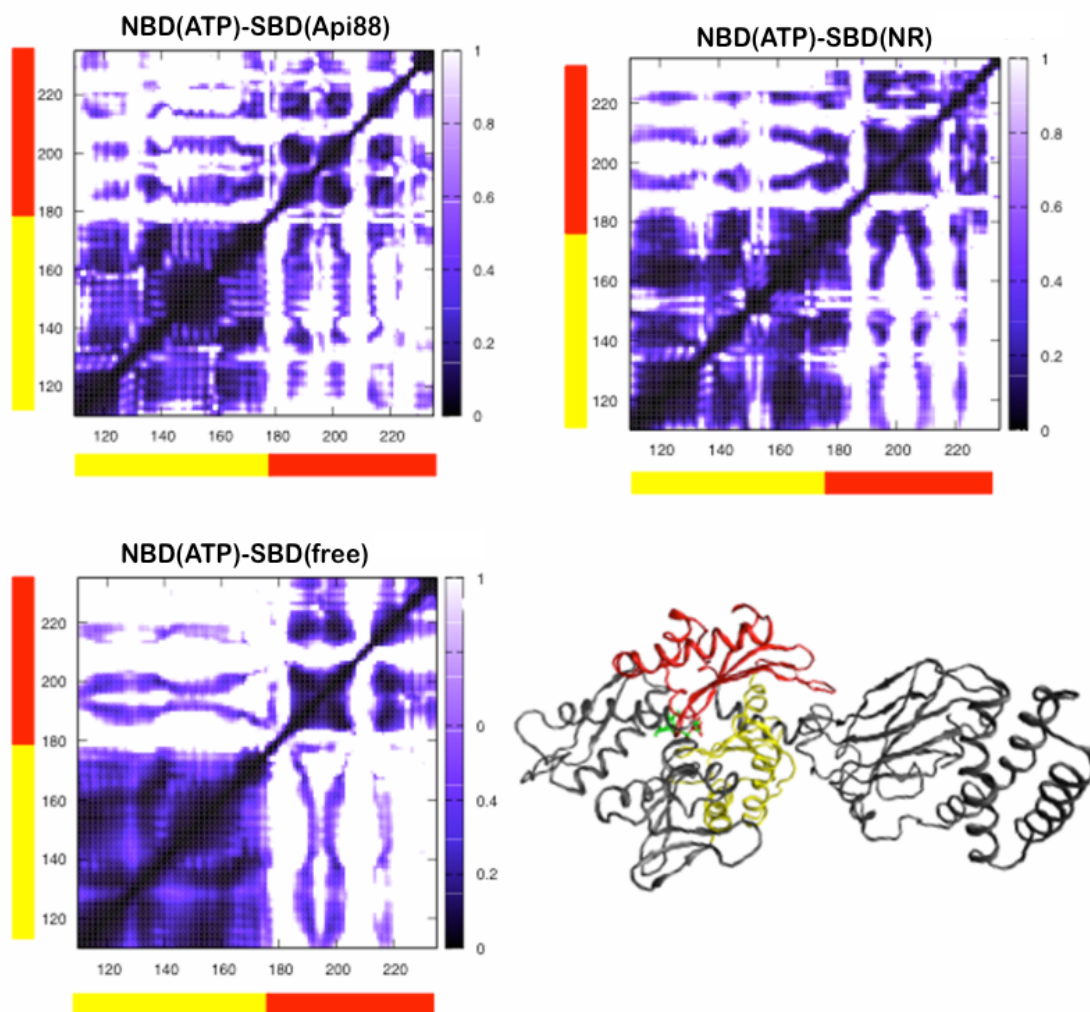

**Figure S5 Lobe I – lobe II coordination.** Matrix of the distance fluctuations calculated and averaged over the two independent trajectories, for each ATP complex. Bars distinguish lobe IB (yellow) and lobe IIB (red)

**Table S2 Minimum distances (nm) reached during the simulation**

| mindist   | Lys155-Asp393 | Arg167-Asp393 |
|-----------|---------------|---------------|
| ADP       | 0,79          | 1,28          |
| ADP-Api88 | 0,68          | 0,62          |
| ADP-NR    | 0,43          | 0,72          |
| ATP       | 1,86          | 1,74          |
| ATP-Api88 | 1,33          | 1,45          |
| ATP-NR    | 0,60          | 0,95          |
